# Supplementary material for: Gestaltung der nächsten Inkarnation von Business Intelligence
Source: Springer Nature journal article supplement (doi:10.1007/s11576-013-0399-6), 2014-01-16
Supplement: 11576_2013_399_MOESM1_ESM.pdf [file 11576_2013_399_MOESM1_ESM.pdf]

# **Gestaltung der nächsten Inkarnation von Business-Intelligence – Flexibel gesteuerte Capability-Netzwerke zur Informationsintegration und -analyse**

**Henning Baars, Carsten Felden, Peter Gluchowski, Andreas Hilbert, Hans-Georg Kemper, Sebastian Olbrich**

WIRTSCHAFTSINFORMATIK (2014) 56 (1)

**Anhang (verfügbar online über <http://springerlink.com>)**

# Anhang

Tab. 1-A Klassifikationsschema und Anzahl von Artikeln (nur zwei Hierarchieebenen)

|                                                            | Academic | Industry | Total |
|------------------------------------------------------------|----------|----------|-------|
| <b>BI strategy and structures / BI governance</b>          |          |          |       |
| BI strategy                                                | 2        | 6        | 8     |
| BI governance                                              | 7        | 25       | 32    |
| BI Competence Centers (BICC)                               | 7        | 9        | 16    |
| Central vs. decentral BI steering                          | 7        | 4        | 11    |
| BI sourcing / BI sourcing strategies                       | 2        | 2        | 4     |
| Managerial control for BI / indicator systems              | 4        | 2        | 6     |
| Structures for agile BI                                    | 2        | 4        | 6     |
| Role concepts for BI                                       | 3        | 1        | 4     |
| Other / general                                            | 2        | 10       | 12    |
| <b>BI architectures</b>                                    |          |          |       |
| Architecture frameworks for BI and Data Warehousing        | 26       | 25       | 51    |
| BI architectures for handling unstructured data            | 10       | 4        | 14    |
| Real time and active Data Warehousing                      | 9        | 8        | 17    |
| BI appliances and In-Memory BI                             | 2        | 10       | 12    |
| Cloud BI and BI architectures                              | 10       | 10       | 20    |
| NoSQL Repositories / BI and Big Data                       | 18       | 71       | 89    |
| Architectures for mobile BI                                | 6        | 10       | 16    |
| BI and service-oriented architectures                      | 5        | 1        | 6     |
| BI and Ubiquitous Computing                                | 7        | 2        | 9     |
| BI and Master Data Management                              | 2        | 11       | 13    |
| Other / general                                            | 10       | 13       | 23    |
| <b>BI application domains</b>                              |          |          |       |
| BI for SME                                                 | 1        | 6        | 7     |
| BI across enterprise borders                               | 8        | 1        | 9     |
| Industry specific BI applications                          | 98       | 51       | 149   |
| Business function specific BI applications                 | 108      | 42       | 150   |
| Other / general                                            | 3        | 2        | 5     |
| <b>Operational BI and BI for Process Management</b>        |          |          |       |
| Application areas for operational BI                       | 5        | 2        | 7     |
| Integrating BI into operational processes and applications | 8        | 3        | 11    |
| BI in process management                                   | 21       | 8        | 29    |
| Other / general                                            | 2        | 6        | 8     |
| <b>BI development and operations</b>                       |          |          |       |
| BI development                                             | 63       | 62       | 125   |
| BI operations                                              | 14       | 13       | 27    |
| Both development and operations                            | 1        | 8        | 9     |
| <b>Data and Information quality</b>                        |          |          |       |
| Measuring Data and Information Quality                     | 9        | 3        | 12    |
| Metrics                                                    | 4        | 3        | 7     |
| Data quality for unstructured data                         | 1        | 1        | 2     |
| Data Quality Management (DQM) tools                        | 9        | 12       | 21    |
| DQM organisation                                           | 2        | 8        | 10    |
| Other / general                                            | 6        | 19       | 25    |
| <b>Modeling and component design for BI</b>                |          |          |       |
| Data modeling and BI                                       | 40       | 39       | 79    |
| Ontologies and BI / BI and the Semantic Web                | 20       | 0        | 20    |
| Meta data modeling                                         | 3        | 2        | 5     |
| BI-oriented process modeling                               | 2        | 1        | 3     |
| Service-oriented models for BI                             | 4        | 0        | 4     |
| BI and reference modeling                                  | 7        | 1        | 8     |
| ETL modeling                                               | 9        | 3        | 12    |
| Design of BI components                                    | 98       | 68       | 166   |
| Other / general                                            | 1        | 1        | 2     |
| <b>Analytics</b>                                           |          |          |       |
| OLAP based analytics                                       | 28       | 1        | 29    |
| Data Mining                                                | 139      | 33       | 172   |
| Web Mining                                                 | 14       | 1        | 15    |
| Text Mining / analysis of un- and semistructured data      | 69       | 5        | 74    |
| Process Mining                                             | 16       | 0        | 16    |
| Social Network Analysis                                    | 52       | 15       | 67    |
| Spatial BI / BI and geodata                                | 10       | 7        | 17    |
| Data visualisation and visual analytics                    | 9        | 8        | 17    |
| Analysis of stream data and Complex Event Processing       | 4        | 0        | 4     |
| Other / general                                            | 19       | 20       | 39    |
| <b>BI and general IS themes</b>                            |          |          |       |
| BI and IS theory                                           | 18       | 2        | 20    |
| Evaluation of BI approaches                                | 43       | 17       | 60    |
| User behaviour and its steering                            | 23       | 7        | 30    |
| Acceptance and Diffusion of BI                             | 16       | 1        | 17    |
| BI and culture                                             | 8        | 8        | 16    |
| BI and knowledge management                                | 15       | 2        | 17    |
| Collaborative BI / CSCW and BI                             | 6        | 5        | 11    |
| Technology and innovation management and BI, BI trends     | 4        | 14       | 18    |
| Other / general                                            | 14       | 7        | 21    |

**Tab. 2-A Quellen**

| Type                    | Name                                                                                                            |
|-------------------------|-----------------------------------------------------------------------------------------------------------------|
| BI, Academic            | ACM International Workshop On Data Warehousing and OLAP (DOLAP)                                                 |
| BI, Academic            | Business Intelligence Journal (not TDWI)                                                                        |
| BI, Academic            | Decision Support Systems                                                                                        |
| BI, Academic            | International conference on Very large data bases (VLDB)                                                        |
| BI, Academic            | International Journal of Business Intelligence and Data Mining                                                  |
| BI, Academic            | International Journal of Business Intelligence Research                                                         |
| BI, Academic            | Journal of Management Information Systems (JMIS)                                                                |
| BI, Academic            | Workshop BI (FG BI, GI e.V.)                                                                                    |
| BI, Industry            | BI Spektrum                                                                                                     |
| BI, Industry            | BI Journal TDWI                                                                                                 |
| BI, Industry            | <a href="http://www.b-eye-network.com/">http://www.b-eye-network.com/</a>                                       |
| BI, Industry            | DW, EA (2010, 2012)                                                                                             |
| BI, Industry            | <a href="http://www.information-management.com/">http://www.information-management.com/</a> (formerly DMReview) |
| BI, Industry            | TDWI Conference (conference)                                                                                    |
| IS & Business, Academic | ACM Transactions on Information Systems                                                                         |
| IS & Business, Academic | Americas Conference on Information Systems (AMCIS)                                                              |
| IS & Business, Academic | Annual Conference der European Marketing Academy (EMAC)                                                         |
| IS & Business, Academic | Communications of the ACM                                                                                       |
| IS & Business, Academic | European Conference on Information Systems (ECIS)                                                               |
| IS & Business, Academic | European Journal of Information Systems                                                                         |
| IS & Business, Academic | Hawaii International Conference on System Sciences (HICSS)                                                      |
| IS & Business, Academic | HMD Praxis der Wirtschaftsinformatik                                                                            |
| IS & Business, Academic | Human-Computer Interaction                                                                                      |
| IS & Business, Academic | IEEE Software                                                                                                   |
| IS & Business, Academic | Information and Management                                                                                      |
| IS & Business, Academic | Information Systems Journal (ISJ)                                                                               |
| IS & Business, Academic | Information Systems Research (ISR)                                                                              |
| IS & Business, Academic | INFORMS Journal on Computing                                                                                    |
| IS & Business, Academic | International Business Review                                                                                   |
| IS & Business, Academic | International Conference on Information Systems (ICIS)                                                          |
| IS & Business, Academic | Journal of Business Logistics                                                                                   |
| IS & Business, Academic | Journal of Information Technology                                                                               |
| IS & Business, Academic | Journal of International Business Studies                                                                       |
| IS & Business, Academic | Journal of Strategic Information Systems (JSIS, Journal)                                                        |
| IS & Business, Academic | Journal of the Association for Information Systems (JAIS)                                                       |
| IS & Business, Academic | Management Science                                                                                              |
| IS & Business, Academic | Multikonferenz Wirtschaftsinformatik (MKWI)                                                                     |
| IS & Business, Academic | MCIS                                                                                                            |
| IS & Business, Academic | Mediterranean Conference on Information Systems (MCIS)                                                          |
| IS & Business, Academic | MIS Quarterly                                                                                                   |
| IS & Business, Academic | Pacific Asia Conference on Information Systems (PACIS)                                                          |
| IS & Business, Academic | Wirtschaftsinformatik / Business & Information Systems Engineering (BISE) (Journal)                             |
| IS & Business, Academic | Wirtschaftsinformatik (Conference)                                                                              |
